# Supplementary material
Source: PubMed Central journal article supplement (PMC8442354)

## Supplementary tables

Supplementary Table 1 Post-hoc comparisons across image modality and muscle compartment

| Modality | Muscle             | Comparison            | Difference* | $t_{(df)}$           | $p$    | $fdr$ |
|----------|--------------------|-----------------------|-------------|----------------------|--------|-------|
| Volume   | Tibialis Anterior  | Healthy Adults-PreDM1 | 0.541       | $t_{(120,5)}=2.637$  | 0.009  | 0.028 |
|          |                    | Healthy Adults-DM1    | 0.595       | $t_{(82,1)}=3.602$   | 0.001  | 0.004 |
|          |                    | PreDM1-DM1            | 0.054       | $t_{(121,3)}=0.327$  | 0.744  | 0.858 |
|          | Tibialis Posterior | Healthy Adults-PreDM1 | 0.214       | $t_{(134,1)}=0.855$  | 0.394  | 0.506 |
|          |                    | Healthy Adults-DM1    | 0.273       | $t_{(84,8)}=1.430$   | 0.156  | 0.243 |
|          |                    | PreDM1-DM1            | 0.060       | $t_{(128,2)}=0.277$  | 0.782  | 0.880 |
|          | Soleus             | Healthy Adults-PreDM1 | 0.469       | $t_{(133,4)}=1.782$  | 0.077  | 0.144 |
|          |                    | Healthy Adults-DM1    | 0.602       | $t_{(84,6)}=2.863$   | 0.005  | 0.018 |
|          |                    | PreDM1-DM1            | 0.133       | $t_{(120,1)}=0.626$  | 0.533  | 0.631 |
|          | Gastrocnemius      | Healthy Adults-PreDM1 | 0.796       | $t_{(75,4)}=3.742$   | <0.001 | 0.003 |
|          |                    | Healthy Adults-DM1    | 0.645       | $t_{(76,9)}=3.768$   | <0.001 | 0.003 |
|          |                    | PreDM1-DM1            | -0.151      | $t_{(75,7)}=-0.917$  | 0.362  | 0.479 |
|          | Peroneus Longus    | Healthy Adults-PreDM1 | 0.181       | $t_{(126,8)}=0.720$  | 0.473  | 0.575 |
|          |                    | Healthy Adults-DM1    | 0.163       | $t_{(85,3)}=0.762$   | 0.448  | 0.560 |
|          |                    | PreDM1-DM1            | -0.018      | $t_{(96,4)}=-0.103$  | 0.918  | 0.954 |
| T2       | Tibialis Anterior  | Healthy Adults-PreDM1 | -0.436      | $t_{(125,6)}=-1.621$ | 0.108  | 0.186 |
|          |                    | Healthy Adults-DM1    | -0.824      | $t_{(78,5)}=-4.009$  | <0.001 | 0.002 |
|          |                    | PreDM1-DM1            | -0.388      | $t_{(135,8)}=-1.600$ | 0.112  | 0.187 |
|          | Tibialis Posterior | Healthy Adults-PreDM1 | -0.642      | $t_{(128,6)}=-2.378$ | 0.019  | 0.047 |
|          |                    | Healthy Adults-DM1    | -0.690      | $t_{(76,6)}=-3.391$  | 0.001  | 0.005 |
|          |                    | PreDM1-DM1            | -0.048      | $t_{(135,7)}=-0.200$ | 0.842  | 0.924 |
|          | Soleus             | Healthy Adults-PreDM1 | -0.760      | $t_{(112,9)}=-2.917$ | 0.004  | 0.016 |
|          |                    | Healthy Adults-DM1    | -0.767      | $t_{(79,0)}=-3.536$  | 0.001  | 0.004 |
|          |                    | PreDM1-DM1            | -0.006      | $t_{(81,8)}=-0.031$  | 0.975  | 0.975 |

|  |                    |                       |        |                      |        |        |
|--|--------------------|-----------------------|--------|----------------------|--------|--------|
|  |                    | Healthy Adults-PreDM1 | -0.865 | $t_{(124.6)}=-3.481$ | 0.001  | 0.004  |
|  | Gastrocnemius      | Healthy Adults-DM1    | -0.895 | $t_{(76.6)}=-4.297$  | <0.001 | 0.001  |
|  |                    | PreDM1-DM1            | -0.030 | $t_{(99.4)}=-0.166$  | 0.869  | 0.931  |
|  |                    | Healthy Adults-PreDM1 | -0.587 | $t_{(130.4)}=-2.406$ | 0.018  | 0.046  |
|  | Peroneus Longus    | Healthy Adults-DM1    | -0.569 | $t_{(80.9)}=-3.046$  | 0.003  | 0.013  |
|  |                    | PreDM1-DM1            | 0.018  | $t_{(137.0)}=0.084$  | 0.933  | 0.954  |
|  |                    | Healthy Adults-PreDM1 | -0.632 | $t_{(103.1)}=-2.170$ | 0.032  | 0.067  |
|  | Tibialis Anterior  | Healthy Adults-DM1    | -0.228 | $t_{(80.6)}=-1.109$  | 0.271  | 0.369  |
|  |                    | PreDM1-DM1            | 0.405  | $t_{(129.6)}=1.356$  | 0.178  | 0.258  |
|  |                    | Healthy Adults-PreDM1 | -0.928 | $t_{(102.9)}=-3.485$ | 0.001  | 0.004  |
|  | Tibialis Posterior | Healthy Adults-DM1    | -0.339 | $t_{(74.4)}=-1.868$  | 0.066  | 0.129  |
|  |                    | PreDM1-DM1            | 0.589  | $t_{(139.2)}=2.217$  | 0.028  | 0.065  |
|  |                    | Healthy Adults-PreDM1 | -0.784 | $t_{(83.5)}=-2.784$  | 0.007  | 0.021  |
|  | Soleus             | Healthy Adults-DM1    | -0.438 | $t_{(72.5)}=-2.226$  | 0.029  | 0.065  |
|  |                    | PreDM1-DM1            | 0.346  | $t_{(122.6)}=1.222$  | 0.224  | 0.315  |
|  |                    | Healthy Adults-PreDM1 | -0.603 | $t_{(109.5)}=-2.164$ | 0.033  | 0.067  |
|  | Gastrocnemius      | Healthy Adults-DM1    | -1.038 | $t_{(72.6)}=-4.939$  | <0.001 | <0.001 |
|  |                    | PreDM1-DM1            | -0.434 | $t_{(137.0)}=-1.646$ | 0.102  | 0.184  |
|  |                    | Healthy Adults-PreDM1 | -0.748 | $t_{(89.7)}=-2.450$  | 0.016  | 0.046  |
|  | Peroneus Longus    | Healthy Adults-DM1    | -0.269 | $t_{(81.8)}=-1.361$  | 0.177  | 0.258  |
|  |                    | PreDM1-DM1            | 0.480  | $t_{(120.2)}=1.540$  | 0.126  | 0.203  |

\*Refers to the difference in marginal means.

Abbreviations:  $t(df)$ =t statistics and degrees of freedom (estimated using Satterthwaite's approximation).  $p$ = unadjusted p-value;  $fdr$ = false discovery rate;

Supplementary Table 2: Summary statistics for predictor variables in the models evaluating muscle imaging outcomes

| Modality            | Muscle             | Group            |          |            | Age              |          |            | Sex              |          |            |
|---------------------|--------------------|------------------|----------|------------|------------------|----------|------------|------------------|----------|------------|
|                     |                    | Statistic        | <i>p</i> | <i>fdr</i> | Statistic        | <i>p</i> | <i>fdr</i> | Statistic        | <i>p</i> | <i>fdr</i> |
| <b>Volume</b>       | Tibialis Anterior  | $X^2_{(2)}=13.2$ | 0.001    | 0.004      | $X^2_{(1)}=13.2$ | 0.059    | 0.099      | $X^2_{(1)}=50.4$ | <0.001   | <0.001     |
|                     | Tibialis Posterior | $X^2_{(2)}=2.1$  | 0.359    | 0.384      | $X^2_{(1)}=2.1$  | 0.153    | 0.206      | $X^2_{(1)}=38.4$ | <0.001   | <0.001     |
|                     | Soleus             | $X^2_{(2)}=8.2$  | 0.017    | 0.023      | $X^2_{(1)}=8.2$  | 0.772    | 0.828      | $X^2_{(1)}=14.3$ | <0.001   | <0.001     |
|                     | Gastrocnemius      | $X^2_{(2)}=17.1$ | <0.001   | 0.001      | $X^2_{(1)}=17.1$ | 0.044    | 0.093      | $X^2_{(1)}=54.9$ | <0.001   | <0.001     |
|                     | Peroneus Longus    | $X^2_{(2)}=0.6$  | 0.726    | 0.726      | $X^2_{(1)}=0.6$  | 0.867    | 0.867      | $X^2_{(1)}=24.2$ | <0.001   | <0.001     |
| <b>T2</b>           | Tibialis Anterior  | $X^2_{(2)}=16.3$ | <0.001   | 0.001      | $X^2_{(1)}=16.3$ | 0.050    | 0.093      | $X^2_{(1)}=5.5$  | 0.019    | 0.029      |
|                     | Tibialis Posterior | $X^2_{(2)}=12.1$ | 0.002    | 0.005      | $X^2_{(1)}=12.1$ | 0.024    | 0.061      | $X^2_{(1)}=6.7$  | 0.009    | 0.016      |
|                     | Soleus             | $X^2_{(2)}=13.1$ | 0.001    | 0.004      | $X^2_{(1)}=13.1$ | 0.004    | 0.021      | $X^2_{(1)}=15.8$ | <0.001   | <0.001     |
|                     | Gastrocnemius      | $X^2_{(2)}=18.9$ | <0.001   | 0.001      | $X^2_{(1)}=18.9$ | 0.016    | 0.048      | $X^2_{(1)}=8.2$  | 0.004    | 0.008      |
|                     | Peroneus Longus    | $X^2_{(2)}=10.2$ | 0.006    | 0.010      | $X^2_{(1)}=10.2$ | 0.008    | 0.031      | $X^2_{(1)}=14.0$ | <0.001   | <0.001     |
| <b>Fat Fraction</b> | Tibialis Anterior  | $X^2_{(2)}=4.9$  | 0.086    | 0.099      | $X^2_{(1)}=4.9$  | 0.164    | 0.206      | $X^2_{(1)}=2.9$  | 0.088    | 0.119      |
|                     | Tibialis Posterior | $X^2_{(2)}=12.6$ | 0.002    | 0.004      | $X^2_{(1)}=12.6$ | <0.001   | <0.001     | $X^2_{(1)}=0.2$  | 0.650    | 0.721      |
|                     | Soleus             | $X^2_{(2)}=9.6$  | 0.008    | 0.012      | $X^2_{(1)}=9.6$  | 0.002    | 0.012      | $X^2_{(1)}=0.2$  | 0.673    | 0.721      |
|                     | Gastrocnemius      | $X^2_{(2)}=24.4$ | <0.001   | <0.001     | $X^2_{(1)}=24.4$ | 0.180    | 0.208      | $X^2_{(1)}=0.0$  | 0.852    | 0.852      |
|                     | Peroneus Longus    | $X^2_{(2)}=6.5$  | 0.040    | 0.049      | $X^2_{(1)}=6.5$  | 0.117    | 0.175      | $X^2_{(1)}=0.2$  | 0.636    | 0.721      |

*Supplementary Table 3: Non-standardized Estimated marginal means for each group across image modality and muscle compartment*

| <i>Modality</i>                | <i>Muscle</i>      | <i>Group</i>   | <i>EMM</i> | <i>95% CI<sub>(emm)</sub></i> |
|--------------------------------|--------------------|----------------|------------|-------------------------------|
| <b>Volume (mm<sup>3</sup>)</b> | Tibialis Anterior  | Healthy Adults | 179052.8   | 171826.7-186278.8             |
|                                |                    | PreDM1         | 159950.8   | 147515.8-172385.8             |
|                                |                    | DM1            | 158048.2   | 148912.1-167184.2             |
|                                | Tibialis Posterior | Healthy Adults | 212180.2   | 202351.4-222009.0             |
|                                |                    | PreDM1         | 203250.1   | 184880.0-221620.2             |
|                                |                    | DM1            | 200762.6   | 188032.7-213492.6             |
|                                | Soleus             | Healthy Adults | 339218.2   | 319574.1-358862.2             |
|                                |                    | PreDM1         | 303763.6   | 269212.4-338314.7             |
|                                |                    | DM1            | 293752.4   | 268483.3-319021.5             |
|                                | Gastrocnemius      | Healthy Adults | 369435.9   | 349110.3-389761.5             |
|                                |                    | PreDM1         | 295530.7   | 260139.8-330921.6             |
|                                |                    | DM1            | 309550.7   | 283341.1-335760.3             |
|                                | Peroneus Longus    | Healthy Adults | 105990.6   | 99626.7-112354.5              |
|                                |                    | PreDM1         | 101699.8   | 91500.5-111899.1              |
|                                |                    | DM1            | 102130.6   | 94018.6-110242.5              |
| <b>T2 (ms)</b>                 | Tibialis Anterior  | Healthy Adults | 44.6       | 43.2-46.0                     |
|                                |                    | PreDM1         | 47.1       | 44.4-49.9                     |
|                                |                    | DM1            | 49.4       | 47.5-51.3                     |
|                                | Tibialis Posterior | Healthy Adults | 42.1       | 40.7-43.5                     |
|                                |                    | PreDM1         | 45.7       | 43.1-48.4                     |
|                                |                    | DM1            | 46.0       | 44.2-47.8                     |
|                                | Soleus             | Healthy Adults | 41.0       | 39.2-42.9                     |
|                                |                    | PreDM1         | 46.3       | 43.2-49.5                     |
|                                |                    | DM1            | 46.4       | 43.9-48.8                     |

|                     |                    |                |      |           |
|---------------------|--------------------|----------------|------|-----------|
|                     |                    | Healthy Adults | 45.5 | 43.5-47.6 |
|                     | Gastrocnemius      | PreDM1         | 52.4 | 49.0-55.8 |
|                     |                    | DM1            | 52.6 | 50.0-55.3 |
|                     |                    | Healthy Adults | 41.6 | 40.2-42.9 |
|                     | Peroneus Longus    | PreDM1         | 45.1 | 42.5-47.6 |
|                     |                    | DM1            | 45.0 | 43.2-46.7 |
| <b>Fat Fraction</b> |                    | Healthy Adults | 9.0  | 8.4-9.6   |
|                     | Tibialis Anterior  | PreDM1         | 10.5 | 9.3-11.8  |
|                     |                    | DM1            | 9.6  | 8.8-10.3  |
|                     |                    | Healthy Adults | 7.5  | 7.0-8.0   |
|                     | Tibialis Posterior | PreDM1         | 9.5  | 8.5-10.5  |
|                     |                    | DM1            | 8.2  | 7.6-8.9   |
|                     |                    | Healthy Adults | 6.1  | 5.5-6.7   |
|                     | Soleus             | PreDM1         | 8.1  | 6.8-9.4   |
|                     |                    | DM1            | 7.2  | 6.4-8.0   |
|                     |                    | Healthy Adults | 6.9  | 5.6-8.1   |
|                     | Gastrocnemius      | PreDM1         | 9.9  | 7.4-12.5  |
|                     |                    | DM1            | 12.2 | 10.5-13.9 |
|                     |                    | Healthy Adults | 9.5  | 8.9-10.0  |
|                     | Peroneus Longus    | PreDM1         | 11.1 | 9.9-12.3  |
|                     |                    | DM1            | 10.1 | 9.4-10.7  |

EMM=Estimated marginal mean

CI=Confidence interval

Supplementary Figure 1

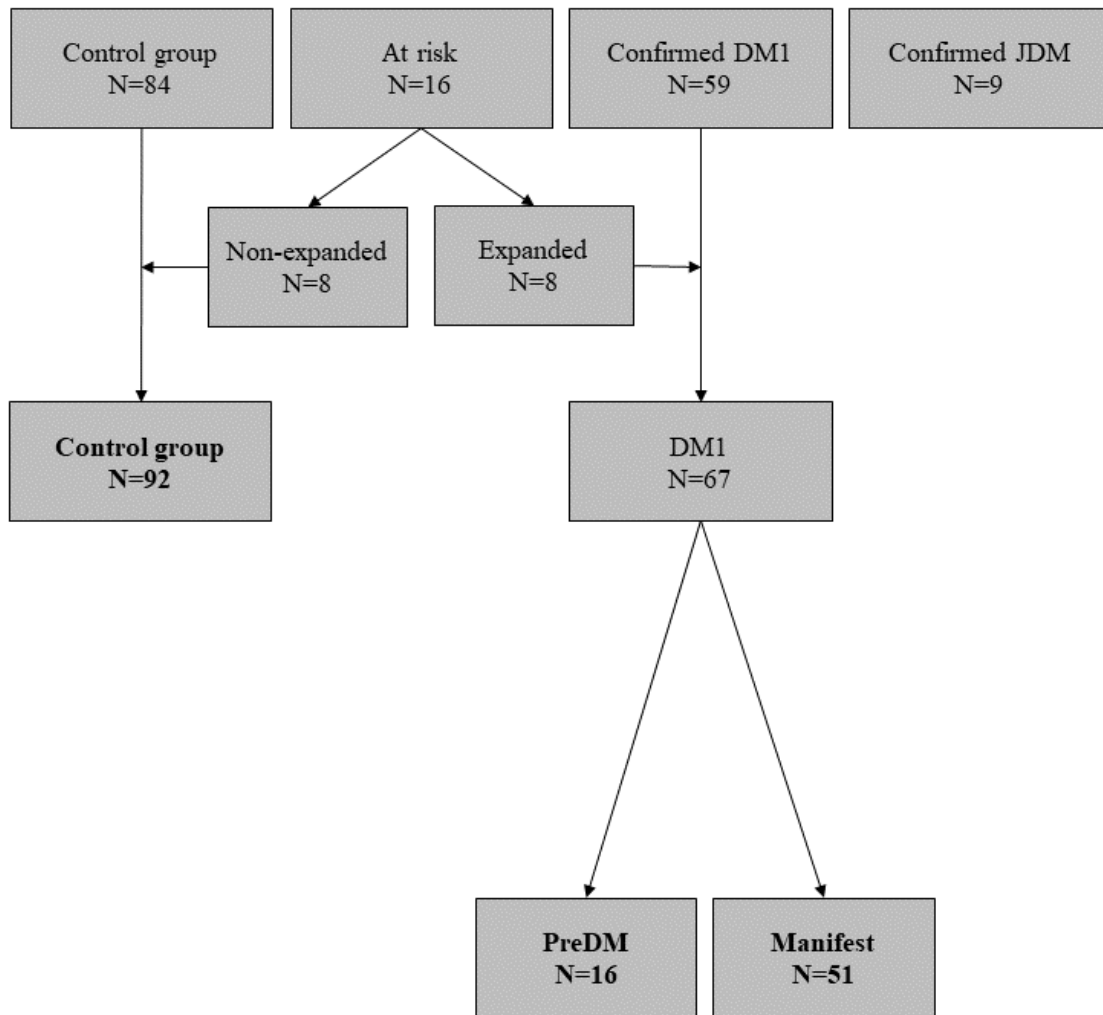

Supplementary Figure 2

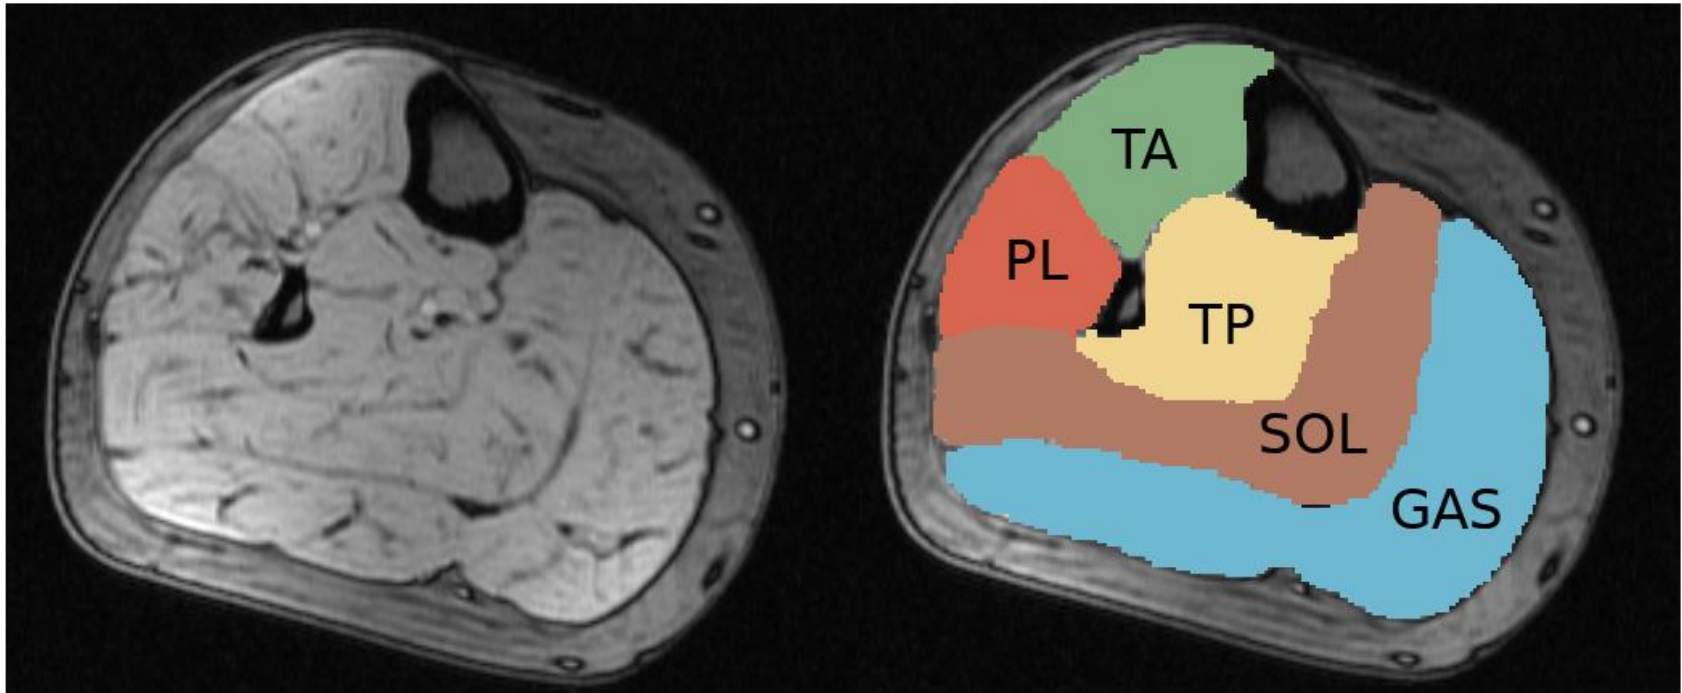

Supplement: NIHMS1731278-supplement-Supplementary_materials.pdf [file NIHMS1731278-supplement-Supplementary_materials.pdf]
